# Supplementary material for: Sustainable hydrothermal carbon for advanced electrochemical energy storage
Source: Royal Society of Chemistry journal article supplement (doi:10.1039/d3ta07372f), 2024-01-01
Supplement: d3ta07372f1.pdf [file d3ta07372f1.pdf]

## Sustainable hydrothermal carbon for advanced electrochemical energy storage

Xuesong Zhang <sup>1\*</sup>, Tianqi Cao <sup>1</sup>, Guanyu Zhang, Quan Liu, Ge Kong, Kejie Wang, Yuan  
Jiang, Xin Zhang, Lujia Han \*

<sup>a</sup> *Engineering Laboratory for AgroBiomass Recycling & Valorizing, College of  
Engineering, China Agricultural University, Beijing 100083, China*

*\*Corresponding author, E-mail: [xs Zhang@cau.edu.cn](mailto:xs Zhang@cau.edu.cn) (X. Zhang); [hanlj@cau.edu.cn](mailto:hanlj@cau.edu.cn)*

*(L. Han)*

<sup>1</sup> These authors contributed equally to this article.

**Supplementary**



**Table S1** Physicochemical properties of raw hydrochar prepared by the hydrothermal processing of selected feedstock.<sup>a</sup>

| Feedstock                      | HT  | Reaction conditions |              |         | Yield (wt%) | Proximate analysis |              |              | Ultimate analysis (wt%) |           |              |           |           | Atomic ratio |           | pH         | HHV (MJ/kg) | Ref.         |
|--------------------------------|-----|---------------------|--------------|---------|-------------|--------------------|--------------|--------------|-------------------------|-----------|--------------|-----------|-----------|--------------|-----------|------------|-------------|--------------|
|                                |     | T (°C)              | RT (h)       | F/W     |             | FC                 | VM           | Ash          | C                       | H         | O            | N         | S         | H/C          | O/C       |            |             |              |
| Loblolly pine                  | HTC | 200-230             | 0.01-7-0.083 | 1:30    | 62.44-79.09 | 14.4-4-17.04       | 82.9-1-86.13 | -            | 51.4-4-53.05            | 6.14-6.48 | 40.3-9-42.17 | -         | -         | -            | -         | -          | 21.41-22.39 | <sup>1</sup> |
| Sewage sludge                  | HTC | 180-260             | 0.5-8        | 1:9     | 53.00-66.19 | 6.14-13.24         | 16.7-9-34.33 | 59.5-3-72.02 | 19.6-2-24.49            | 3.22-3.73 | 2.13-10.54   | 1.12-1.64 | 0.49-0.67 | 1.80-1.99    | 0.07-0.33 | -          | 9.80-11.79  | <sup>2</sup> |
| Sludge                         | HTC | 220                 | 5            | 1:3-4:1 | 55.12-63.96 | 10.6-3-20.74       | 25.0-6-34.52 | 53.5-3-59.83 | 27.3-7-29.03            | 3.90-4.25 | 0.55-7.67    | 5.35-5.81 | 0.52-0.60 | -            | -         | -          | 10.65-12.89 | <sup>3</sup> |
| Sewage sludge                  | HTC | 160-280             | -            | -       | 65.64-77.50 | 1.89-4.95          | 12.7-4-26.02 | 72.0-9-82.31 | 9.99-13.65              | 1.08-1.77 | 4.39-9.46    | 1.53-2.30 | 0.58-0.73 | 1.28-1.56    | 0.33-0.52 | -          | -           | <sup>4</sup> |
| Sewage sludge (10% humic acid) | HTC | 250                 | 5            | -       | 41.3        | -                  | 30.61        | 60.39        | 16.84                   | 2.45      | 9.14         | 1.88      | 0.3       | -            | -         | -          | 7.66        | <sup>5</sup> |
| Beet pulp                      | HTC | 180-220             | 1-4          | -       | -           | 20.1-29.46         | 77.7-66.71   | 0.88-1.00    | 48.0-60.8               | 5.67-6.15 | 26.3-0-40.33 | 1.61-2.09 | 0-0.1     | -            | -         | 3.9-4-4.45 | 19.61-25.36 | <sup>6</sup> |
| Rice straw                     | HTC | 180-260             | 4            | 8:25    | -           | -                  | -            | 18.1-7-24.41 | 43.5-1-52.75            | 4.40-4.75 | 16.8-5-32.42 | 1.16-1.60 | -         | 0.27-0.36    | 0.40-0.92 | -          | -           | <sup>7</sup> |
| Digestate                      | HTC | 210                 | 0.5-5        | -       | 70.0-75.6   | 20.1-22.4          | 45.6-49.9    | 29.6-31.2    | 41.9-42.4               | 3.4-3.8   | 19.8-22.0    | 2.3-2.4   | 0.26-0.28 | -            | -         | -          | 16.0-16.3   | <sup>8</sup> |
| Rape straw                     | HTC | 160-240             | 0.5          | -       | -           | 12.8-6-32.51       | 56.6-6-79.90 | 7.24-10.83   | 44.9-0-65.67            | 4.98-5.68 | 15.1-7-38.77 | 2.23-2.91 | 0.78-1.33 | 0.91-1.48    | 0.17-0.65 | -          | 18.13-27.04 | <sup>9</sup> |

|                       |     |              |               |                |                 |                         |                         |                   |                         |                   |                         |                   |                |                   |                   |                 |             |               |               |
|-----------------------|-----|--------------|---------------|----------------|-----------------|-------------------------|-------------------------|-------------------|-------------------------|-------------------|-------------------------|-------------------|----------------|-------------------|-------------------|-----------------|-------------|---------------|---------------|
|                       |     | 180          | 0.25-<br>2    | -              | -               | 12.7<br>9-<br>21.1<br>6 | 71.3<br>8-<br>79.1<br>7 | 7.46-<br>8.04     | 53.3<br>9-<br>58.4<br>4 | 5.24-<br>5.47     | 24.9<br>2-<br>29.5<br>0 | 2.49-<br>2.59     | 1.16-<br>1.34  | 1.09-<br>1.18     | 0.32-<br>0.41     |                 | 19.88-22.83 |               |               |
| Cellulose             | HTC | 150 –<br>250 | 0.5           | –              | 50.4 –<br>92.5  | 9.6 –<br>41.2           | 56.9<br>–<br>88.9       | 1.2 –<br>1.9      | 43.9<br>–<br>69.4       | 4.6 –<br>6.6      | 24.1<br>–<br>48         | –                 | –              | 0.80<br>–<br>1.80 | 0.26<br>–<br>0.82 | –               | 16.6 – 26.8 | <sup>10</sup> |               |
| Holocellulose         | HTC | 220          | 4 –<br>20     | 3:20           | 22.0 –<br>66.7  | 5.58<br>–<br>50.4       | 44.2<br>–<br>87.9       | 1.31<br>–<br>5.10 | 48.7<br>–<br>73.0       | 4.32<br>–<br>5.71 | 22.6<br>–<br>45.6       | –                 | –              | 0.71<br>–<br>1.60 | 0.23<br>–<br>0.85 | –               | 16.5 – 26.8 | <sup>11</sup> |               |
| Bamboo                | HTC | 200 –<br>260 | 1             | 1:10           | 39.3 –<br>64.8  | 1.09<br>–<br>43.9       | 55.1<br>–<br>98.0       | 0.95<br>–<br>1.11 | 56.0<br>–<br>73.2       | 5.52<br>–<br>5.99 | 21.3<br>–<br>37.6       | 0.42<br>–<br>0.69 | 0.02 –<br>0.03 | 0.91<br>–<br>1.28 | 0.22<br>–<br>0.50 | 5.2<br>–<br>5.4 | –           |               | <sup>12</sup> |
| Tomato peel           | HTC | 150 –<br>250 | 1.6 –<br>18.4 | 2:125-<br>3:20 | 27.6 –<br>87.7  | –                       | –                       | –                 | 51.9<br>–<br>69.7       | 7.2 –<br>8.2      | 20.9<br>–<br>39.4       | 0.58<br>–<br>2.00 | 0.05 –<br>0.65 | 1.31<br>–<br>1.70 | 0.23<br>–<br>0.57 | –               | 23.6 – 34.8 | <sup>13</sup> |               |
| Corn husk             | HTC | 260          | 0.25          | 1:12           | 33.2            | 28.4                    | 68.1                    | 3.7               | 63.4                    | 5.87              | 25.1                    | 1.93              | <0.01          | 1.11              | 0.30              | –               | 27.7        | <sup>14</sup> |               |
| Corn cobs             | HTC | 230 –<br>260 | 0.5           | 1:6            | –               | –                       | –                       | –                 | 59.0<br>–<br>66.9       | 5.18<br>–<br>5.72 | 27.0<br>–<br>34.5       | 0.67<br>–<br>0.87 | 0.10 –<br>0.12 | 0.93<br>–<br>1.17 | 0.30<br>–<br>0.40 | –               | 21.9 – 25.2 | <sup>15</sup> |               |
| Wheat straw           | HTC | 200 –<br>260 | 6             | 1:20           | 35.7 –<br>53.5  | –                       | –                       | 9.3 –<br>10.8     | 51.2<br>–<br>64.2       | 4.8 –<br>5.7      | 18.8<br>–<br>33.1       | 0.5 –<br>1.1      | 0.2 –<br>0.3   | 0.90<br>–<br>1.34 | 0.22<br>–<br>0.48 | 4.9<br>–<br>6.3 | 21.0 – 26.2 | <sup>16</sup> |               |
| Grape pomace          | HTC | 175 –<br>275 | 0.17<br>–1    | 1:4            | 46.5 –<br>61.1  | 29.2<br>–<br>43.0       | 54.3<br>–<br>69.3       | 1.1 –<br>3.4      | 58.6<br>–<br>68.3       | 5.8 –<br>6.4      | 23.5<br>–<br>33.0       | 1.72<br>–<br>2.32 | –              | 1.04<br>–<br>1.27 | 0.26<br>–<br>0.42 | –               | 24.3 – 28.3 | <sup>17</sup> |               |
| Miscanthus            | HTC | 180 –<br>200 | 2 –<br>12     | 1:10           | 58 – 80         | 15.5<br>–<br>24.3       | 73.2<br>–<br>81.7       | 0.59<br>–<br>1.79 | 53.5<br>–<br>63.0       | 5.8 –<br>6.2      | 29.9<br>–<br>39.2       | 0.07<br>–<br>0.29 | –              | 1.10<br>–<br>1.33 | 0.36<br>–<br>0.55 | –               | 21.1 – 23.9 | <sup>18</sup> |               |
| Cotton stalk          | HTC | 180 –<br>260 | 1 – 8         | 1:15           | ~34.0 –<br>61.8 | 15.0<br>–<br>43.4       | 47.4<br>–<br>71.5       | 5.16<br>–<br>12.0 | 51.2<br>–<br>70.6       | 4.76<br>–<br>5.81 | 10.3<br>–<br>36.6       | 0.68<br>–<br>1.57 | –              | 0.91<br>–<br>1.31 | 0.11<br>–<br>0.54 | –               | 19.7 – 25.1 | <sup>19</sup> |               |
| Solid digestate       | HTC | 180 –<br>260 | 1             | 1:8            | 46.3 –<br>80.7  | –                       | –                       | 9.60<br>–<br>16.7 | 55.2<br>–<br>69.8       | 6.42<br>–<br>7.08 | 19.8<br>–<br>35.2       | 1.88<br>–<br>3.22 | 0.71 –<br>0.78 | 1.09<br>–<br>1.53 | 0.21<br>–<br>0.48 | 5.8<br>–<br>6.8 | 24.1 – 29.9 | <sup>20</sup> |               |
| Lipid extracted algae | HTC | 180 –<br>240 | 0.5           | –              | 51.8 –<br>74.5  | 10.4<br>–               | 78.3<br>–               | 4.10<br>–         | 54.5<br>–               | 7.33<br>–         | 21.8<br>–               | 8.10<br>–         | 0.34 –<br>0.42 | 1.54<br>–         | 0.27<br>–         | –               | 23.6 – 27.7 | <sup>21</sup> |               |

|                          |     |         |       |       |             |             |             |             |             |           |             |           |           |           |           |     |             |        |
|--------------------------|-----|---------|-------|-------|-------------|-------------|-------------|-------------|-------------|-----------|-------------|-----------|-----------|-----------|-----------|-----|-------------|--------|
|                          |     |         |       |       | 16.3        | 85.5        | 6.54        | 59.7        | 8.04        | 27.5      | 8.94        |           | 1.73      | 0.38      |           |     |             |        |
| Sawdust                  | HTC | 220     | 1     | 1:5   | 56.5        | 18.8        | 76.6        | 1.60        | 50.6        | 5.35      | 41.8        | 0.59      | 0.09      | 1.26      | 0.62      | –   | 20.5        | 22     |
| Sewage sludge            |     |         |       |       | 59.1        | 4.40        | 35.8        | 59.8        | 23.6        | 2.84      | 10.6        | 2.56      | 0.56      | 1.43      | 0.34      | –   | 11.8        |        |
| Sewage sludge            | HTC | 220     | 1     | 1:9   | –           | 15.7        | 31.7        | 52.6        | 43.6        | 4.79      | 42.6        | 9.52      | 1.03      | 1.32      | 0.73      | –   | 16.2        | 23     |
| Sawdust                  | HTC | 220     | 10    | 1:6   | 68.2        | 24.6        | 74.4        | 0.85        | 58.1        | 6.06      | 34.1        | 0.91      | 0.01      | 1.25      | 0.44      | –   | 23.9        | 24     |
| Swine manure             |     |         |       |       | 48.7        | 10.3        | 69.8        | 20.4        | 49.5        | 5.78      | 20.8        | 3.15      | 0.35      | 1.40      | 0.32      | –   | 21.5        |        |
| Mixture <sup>b</sup>     |     |         |       |       | 60.5        | 16.4        | 71.9        | 11.7        | 51.0        | 5.92      | 28.1        | 2.94      | 0.33      | 1.39      | 0.41      | –   | 21.62       |        |
| Cow manure               | HTC | 250-300 | 0.5-2 | 1:10  | 51.29-42.25 | 26.5-3-54.1 | 30.2-3-46.0 | 27.4-3-34.2 | 46.5-8-54.1 | 3.76-4.29 | 20.2-8-5.88 | 1.31-1.71 | 0.11-0.32 | 0.81-1.10 | 0.08-0.33 | –   | 19.52-23.62 | 25     |
| Swine manure             | HTC | 180–200 | 10    | 1:4   | 55.5–66.4   | 5.57–8.06   | 68.7–73.1   | 21.3–24.8   | 46.2–50.6   | 5.44–5.72 | 17.1–23.1   | 3.00–3.24 | 0.40–0.45 | 1.29      | 0.25      | –   | –           | 26     |
| Corn stalk <sup>c</sup>  | HTC | 230     | 0.75  | 1:25  | 39.0        | 18.0        | 74.3        | 3.54        | 53.4        | 5.67      | 39.6        | 1.12      | 0.13      | 1.27      | 0.56      | –   | 22.8        | 27     |
|                          |     | 190     | 0.5   | 7:100 | 64.7        | 11.6        | 80.7        | 3.12        | 48.9        | 5.85      | 43.9        | 1.14      | 0.17      | 1.43      | 0.67      | –   | 21.7        |        |
| Red seaweed <sup>c</sup> | HTC | 180     | 0.33  | 3:100 | 32.1        | 24.4        | 59.9        | 15.7        | 45.6        | 6.0       | 46.6        | 1.9       | –         | 1.58      | 0.77      | –   | 17.9        | 28     |
| Cellulose                | HTL | 280     | 0.5   | –     | 46.2        | 55.1        | 42.2        | 2.7         | 76.5        | 4.5       | 16.3        | –         | –         | 0.71      | 0.16      | –   | 27.7        | 10     |
| Cellulose                | HTL | 280     | 4     | 1:10  | 34.0        | –           | –           | –           | 72.9        | 4.73      | 22.4        | –         | –         | 0.78      | 0.23      | –   | 27.1        | 29     |
| Xylan                    |     |         |       |       | –           | –           | –           | –           | 73.0        | 4.65      | 22.6        | –         | –         | 0.76      | 0.23      | –   | 28.1        |        |
| Bamboo                   | HTL | 280     | 1     | 1:10  | 36.7        | 35.5        | 63.8        | 0.71        | 74.6        | 5.37      | 19.2        | 0.81      | 0.03      | 0.86      | 0.19      | 5.3 | –           | 12     |
| Coconut fiber            | HTL | 300–350 | 0.5   | 1:10  | ~ 35–40     | 38.5–42.1   | 53.6–56.6   | 4.3–4.9     | 73.2–73.4   | 4.52–5.09 | 20.2–20.6   | 1.13–1.17 | 0.35–0.36 | 0.74      | 0.21      | –   | 28.7–29.4   | 30     |
| Eucalyptus leaves        |     |         |       |       | ~ 30–40     | 31.7–33.9   | 56.2–61.2   | 7.1–9.9     | 68.9–70.5   | 5.93–6.00 | 20.5–22.8   | 1.60–1.62 | 0.72–1.52 | 1.00      | 0.22      | –   | 28.7–29.4   |        |
| Tahoe mix                | HTL | 295     | 0.5   | 1:8   | 50.1        | –           | –           | –           | 73.0        | 5.14      | 19.9        | 0.14      | –         | –         | 0.20      | –   | 29.5        | 31, 32 |
| Loblolly pine            |     |         |       |       | 52.4        | –           | –           | –           | 72.1        | 4.91      | 21.1        | 0.36      | –         | –         | 0.22      | –   | 29.0        |        |
| Pinyon/Juniper           |     |         |       |       | 48.7        | –           | –           | –           | 71.1        | 5.25      | 21.6        | 0.34      | –         | –         | 0.23      | –   | 28.0        |        |
| Sugarcane bagasse        |     |         |       |       | 42.8        | –           | –           | –           | 64.8        | 4.69      | 19.6        | 0.72      | –         | –         | 0.23      | –   | 24.2        |        |
| Corn stover              |     |         |       |       | 38.0        | –           | –           | –           | 67.4        | 4.78      | 18.1        | 1.18      | –         | –         | 0.20      | –   | 26.3        |        |
| Rice hulls               |     |         |       |       | 52.2        | –           | –           | –           | 49.7        | 3.35      | 15.5        | 0.36      | –         | –         | 0.23      | –   | 18.5        |        |
| Cotton stalk             | HTL | 280–300 | 4     | 1:15  | ~ 25.8–28   | 39.8–       | 45.8–       | 3.21–       | 72.1–       | 5.08–     | 9.22–       | 1.59–     | –         | 0.82      | 0.09      | –   | 25.5–25.7   | 19     |

|                            |     |         |          |       |             |      |      |      |           |           |           |           |           |           |           |           |             |            |    |
|----------------------------|-----|---------|----------|-------|-------------|------|------|------|-----------|-----------|-----------|-----------|-----------|-----------|-----------|-----------|-------------|------------|----|
|                            |     |         |          |       | 43.1        | 50.1 | 9.64 | 73.9 | 5.28      | 17.1      | 1.81      |           | 0.88      | 0.18      |           |           |             |            |    |
| Sewage sludge/wheat stover | HTL | 350     | 0.25-1.5 | 1:10  | 36.66-56.51 | -    | -    | -    | 17.8      | 7-        | 1.56-4.04 | 2.49-7.32 | 1.15-1.90 | 0.35-0.49 | 1.04-1.5  | 0.09-0.27 | -           | 7.53-15.88 | 33 |
| Cow manure                 | HTL | 400     | 0.2-0.5  | 1:10  | 38.90-11.31 | -    | -    | -    | 49.1      | 3.38-6-   | 36.7      | 0.87-1.61 | 0.55-0.59 | 0.70-1.23 | 0.48-0.68 | -         | 18.51-20.43 | 34         |    |
| Cow manure                 | HTL | 425     | 0.2-0.33 | 1:10  | 12.08-45.13 | -    | -    | -    | 41.0      | 2.70-4.86 | 47.0      | 0.98-1.72 | 0.66-0.84 | 0.79-1.32 | 0.76-0.99 | -         | 11.07-16.55 | 35         |    |
| Rice straw                 | HTL | 300     | 1.5      | 1:20  | 25.6        | 26.4 | 52.2 | -    | -         | -         | -         | -         | -         | 0.94      | 0.17      | 5.9       | -           | 36         |    |
| Pig manure                 |     |         |          | 3:20  | 43.7        | 35.4 | 26.8 | -    | -         | -         | -         | -         | -         | 0.91      | 0.19      | 6         | -           |            |    |
| Sugarcane bagasse          | HTL | 300     | 6        | 4:31  | 26.8        | -    | -    | -    | 79.3      | 5.34      | 15.4      | 0.88      | 0.11      | 0.07      | 0.19      | 5.8       | -           | 37         |    |
| Hickory                    |     |         |          | 5:29  | 27.8        | -    | -    | -    | 78.5      | 5.14      | 16.4      | 0.33      | 0.06      | 0.07      | 0.21      | 5.4       | -           |            |    |
| Peanut hull                |     |         |          | 11:62 | 36.9        | -    | -    | -    | 76.4      | 6.07      | 17.5      | 2.06      | 0.13      | 0.08      | 0.23      | 6.0       | -           |            |    |
| Eucalyptus bark            | HTL | 300     | 2        | 1:10  | 40.0        | 34.0 | 60.1 | 5.9  | 72.7      | 5.05      | 22.2      | -         | -         | 0.83      | 0.23      | -         | 29.2        | 38         |    |
| Sawdust                    | HTL | 300     | 1        | 1:10  | 24.9        | -    | -    | 0.52 | -         | -         | -         | -         | -         | 1.02      | 0.28      | 4.1       | -           | 39         |    |
| <i>Salix psammophila</i>   | HTL | 300     | 1        | 2:25  | -           | -    | -    | 15.2 | 66.3      | 5.21      | 27.2      | 1.26      | -         | 0.94      | 0.31      | 5.2       | -           | 40, 41     |    |
| <i>Salix psammophila</i>   | HTL | 300     | 1        | 1:10  | 35.0        | -    | -    | 7.92 | 73.6      | 7.90      | 17.7      | 0.80      | -         | 1.29      | 0.18      | -         | -           | 42         |    |
| <i>S. platensis</i>        | HTL | 350     | 3        | 1:3   | 6.0         | -    | -    | -    | 24.6      | 2.61      | 6.62      | 2.07      | 0.30      | 0.23      | -         | 13.1      | -           | 43         |    |
| <i>N. salina</i>           | HTL | 310-350 | 2-3      | 1:3   | 28.0-32.0   | -    | -    | -    | 67.7-67.9 | 7.26-7.75 | 9.30-10.6 | 2.63-2.65 | 0.93-1.76 | 0.41-0.47 | -         | -         | 32.5-33.6   | 43         |    |
| Coconut fiber              | HTG | 375     | 0.5      | 1:10  | 35.3        | 48.8 | 42.6 | 8.6  | 78.2      | 4.31      | 15.9      | 1.23      | 0.33      | 0.66      | 0.15      | -         | 30.6        | 30         |    |
| Eucalyptus leaves          |     |         |          |       | 28.1        | 42.6 | 43.2 | 14.2 | 72.2      | 4.81      | 19.9      | 1.64      | 1.51      | 0.80      | 0.21      | -         | 28.7        |            |    |
| Wheat straw                | HTG | 460     | 0.33     | 1:100 | -           | -    | -    | 9.8  | 66.9      | 2.05      | 18.2      | 2.4       | 0.65      | 0.37      | 0.20      | -         | -           | 44         |    |
| <i>C. glomerata</i>        |     |         |          |       | -           | -    | -    | 36.2 | 44.2      | 2.5       | 10.6      | 3.4       | 3.1       | 0.68      | 0.18      | -         | -           |            |    |

<sup>a</sup> HT: hydrothermal technologies; T: temperature; RT: retention time; F/W: feed to water mass ratio; FC: fixed carbon; VM: volatile matter; HHV: higher heating value.

<sup>b</sup> Hydrochar was produced from co-HTC of swine manure and sawdust in the mass ratio of 3:1.

<sup>c</sup> Hydrochar was produced from microwave-assisted HTC.

**Table S2** Main inorganic element content in pristine hydrochar obtained from hydrothermal processing of various feedstocks.

| Feedstock                              | HT  | Reaction conditions |        |      | P (g/kg)      | K (g/kg)      | Ca (g/kg)      | Mg (g/kg)     | Na (g/kg)   | Si (g/kg)       | Al (g/kg)      | Fe (g/kg)   | Cu (g/kg) | Zn (g/kg)      | Ni (g/kg) | Ti (g/kg)   | Ref. |
|----------------------------------------|-----|---------------------|--------|------|---------------|---------------|----------------|---------------|-------------|-----------------|----------------|-------------|-----------|----------------|-----------|-------------|------|
|                                        |     | T (°C)              | RT (h) | F/W  |               |               |                |               |             |                 |                |             |           |                |           |             |      |
| Sewage sludge                          | HTC | 180                 | 1      | –    | –             | 7.2           | 14.4           | 18.9          | 3.3         | 18.5            | 21.8           | 20.3        | 2.8       | 1.5            | 2.0       | 1.4         | 45   |
| Sewage sludge                          | HTC | 220                 | 1      | 1:5  | –             | 18.1          | 17.4           | 12.3          | 6.7         | 17.4            | 35.0           | 43.4        | 1.9       | 0.7            | 0.4       | 13.7        | 22   |
| Sawdust                                |     |                     |        |      | –             | 2.5           | 9.0            | 1.6           | 1.1         | 2.6             | 0.8            | 1.0         | 0.3       | 0              | 0         | 1.7         |      |
| Mixture <sup>c</sup>                   |     |                     |        |      | –             | 5.4 – 10.9    | 5.0 – 13.0     | 3.2 – 9.0     | 2.0 – 4.3   | 5.0 – 10.4      | 10.3 – 21.4    | 10.3 – 31.7 | 0.8 – 1.4 | 0.2 – 0.5      | 0 – 0.2   | 3.4 – 9.7   |      |
| Lincomycin residue <sup>d</sup>        | HTC | 120 – 210           | 1      | 1:10 | –             | –             | 87.5 – 167     | 1.08 – 2.96   | –           | –               | 1.91 – 2.36    | 11.5 – 23.2 | –         | – <sup>r</sup> | –         | –           | 46   |
| Cow manure                             | HTC | 275                 | 30     | 1:10 | –             | 0.22          | 9.78           | 5.68          | 0.12        | –               | 0.48           | 2.01        | –         | –              | –         | –           | 25   |
| Herbal tea waste                       | HTC | 120 – 240           | 0.5    | 1:10 | 3.35 – 8.45   | 6.61 – 9.62   | 43.11 – 47.60  | 3.79 – 6.23   | 0.51 – 0.64 | 28.39 – 40.06   | 10.01 – 15.06  | 12.09       | –         | –              | –         | 1.31 – 2.37 | 47   |
|                                        | HTL | 300                 |        |      | 4.68          | 6.75          | 49.98          | 20.39         | 0.40        | 78.95           | 26.99          | 46.81       | –         | –              | –         | 3.93        |      |
| Penicillin mycelial waste <sup>d</sup> | HTC | 120 – 240           |        |      | 16.15 – 65.12 | 4.22 – 11.07  | 57.26 – 163.13 | 2.59 – 11.60  | 0.60 – 1.06 | 0.69 – 1.27     | 0.86 – 1.70    | 1.87 – 6.78 | –         | –              | –         | –           |      |
|                                        | HTL | 300                 |        |      | 113.39        | 4.16          | 232.97         | 21.58         | 0.61        | 2.02            | 2.04           | 8.36        | –         | –              | –         | –           |      |
| Sewage sludge                          | HTC | 120 – 240           |        |      | 33.0 – 39.88  | 16.29 – 17.73 | 21.01 – 23.50  | 11.63 – 14.66 | 1.34 – 1.42 | 190.53 – 200.31 | 87.44 – 106.51 | 42.17       | –         | –              | –         | 4.84 – 5.06 |      |
|                                        | HTL | 300                 |        |      | 39.05         | 18.62         | 24.14          | 15.56         | 1.39        | 210.61          | 109.78         | 46.48       | –         | –              | –         | 5.10        |      |
| Swine manure                           | HTL | 330                 | 0.5    | 1:5  | 30000         | 4050          | 13261          | 13980         | 1757        | –               | 18750          | 16902       | 3940      | 2930           | 64        | –           | 48   |
| Micoralgae                             |     |                     |        |      | 80569         | 12590         | 29146          | 2001          | 4826        | –               | 9001           | 20015       | 425       | 900            | 189       | –           |      |
| Salix psammophila                      | HTC | 180 – 270           | 0 – 4  | 1:10 | –             | 0.12 – 0.13   | 10.9 – 13.2    | 0.16 – 0.33   | 0.02 – 0.04 | –               | –              | –           | –         | –              | –         | –           | 49   |

|                                   |     |             |      |       |         |      |              |              |              |   |       |              |   |   |   |   |    |
|-----------------------------------|-----|-------------|------|-------|---------|------|--------------|--------------|--------------|---|-------|--------------|---|---|---|---|----|
|                                   | HTL | 300         | 1    | 1:10  | –       | 0.15 | 7.38         | 0.64         | 0.02         | – | –     | –            | – | – | – | – |    |
| Rice straw                        | HTL | 300         | 1    | 1:10  | –       | 0.42 | 5.63         | 3.52         | 0.01         | – | –     | –            | – | – | – | – |    |
| Bamboo                            |     |             |      |       | –       | 0.01 | BDL          | 0.03         | BDL          | – | –     | –            | – | – | – | – |    |
| Soybean straw                     |     |             |      |       | –       | 0.43 | 3.21         | 0.32         | BDL          | – | –     | –            | – | – | – | – |    |
| Pomelo peel                       |     |             |      |       | –       | 0.09 | 2.97         | 0.30         | BDL          | – | –     | –            | – | – | – | – |    |
| Pine needle                       |     |             |      |       | –       | 0.29 | 7.05         | 0.86         | 0.04         | – | –     | –            | – | – | – | – |    |
| <i>Enteromorpha<br/>prolifera</i> |     |             |      |       | –       | 1.89 | 47.1         | 12.7         | 0.24         | – | –     | –            | – | – | – | – |    |
| Sugarcane<br>bagasse              | HTC | 200-<br>250 | 6    | 4:31  | 0 – 0.2 | 0.1  | 0.3 –<br>0.4 | 0.2 –<br>0.3 | 0.3          | – | 0.1   | 0.1          | – | – | – | – | 37 |
|                                   | HTL | 300         |      |       | 0.3     | 0.1  | 0.6          | 0.3          | 0.4          | – | 0.1   | 0.1          | – | – | – | – |    |
| Hickory                           | HTC | 200-<br>250 |      | 5:29  | 0       | 0.1  | 0.7 –<br>0.8 | 0.3 –<br>0.4 | 0.2 –<br>0.4 | – | 0.1   | 0.1 –<br>0.3 | – | – | – | – |    |
|                                   | HTL | 300         |      |       | 0.1     | 0.1  | 1.3          | 0.1          | 0.1          | – | 0.1   | 0.4          | – | – | – | – |    |
| Peanut hull                       | HTC | 200-<br>250 |      | 11:62 | 0.6 –   | 0.3  | 0.7 –        | 0.2 –        | 0.2 –        | – | 0.1 – | 0.2 –        | – | – | – | – |    |
|                                   | HTL | 300         |      |       | 0.7     |      | 0.8          | 0.3          | 0.3          |   | 0.4   | 0.4          |   |   |   |   |    |
|                                   | HTL | 300         |      |       | 1.7     | 0.3  | 1.6          | 0.5          | 0.2          | – | 0.4   | 0.3          | – | – | – | – |    |
| Wheat straw                       | HTG | 460         | 0.33 | 1:100 | –       | 41.1 | 54.2         | 5.7          | 18.0         | – | –     | –            | – | – | – | – | 44 |
| <i>C. glomerata</i>               |     |             |      |       | –       | 294  | 122          | 82           | 175          | – | –     | –            | – | – | – | – |    |
| Cattle manure                     | HTG | 440         | 0.33 | 1:39  | –       | 57.4 | 48.6         | 13.4         | 26.7         | – | –     | –            | – | – | – | – | 50 |

<sup>a</sup> HT: hydrothermal technologies; T: temperature; RT: retention time; F/W: feed to water mass ratio; BDL: below detection limit;

<sup>b</sup> Hydrochar was produced from co-HTC of swine manure and sawdust in the mass ratio of 3:1 with water recirculation from 0 – 4 times;

<sup>c</sup> Hydrochar was produced from co-HTC of sawdust and sewage sludge in the mass ratio of 1:3 – 3:1.

<sup>d</sup> Hydrochar was produced from microwave-assisted HTC.





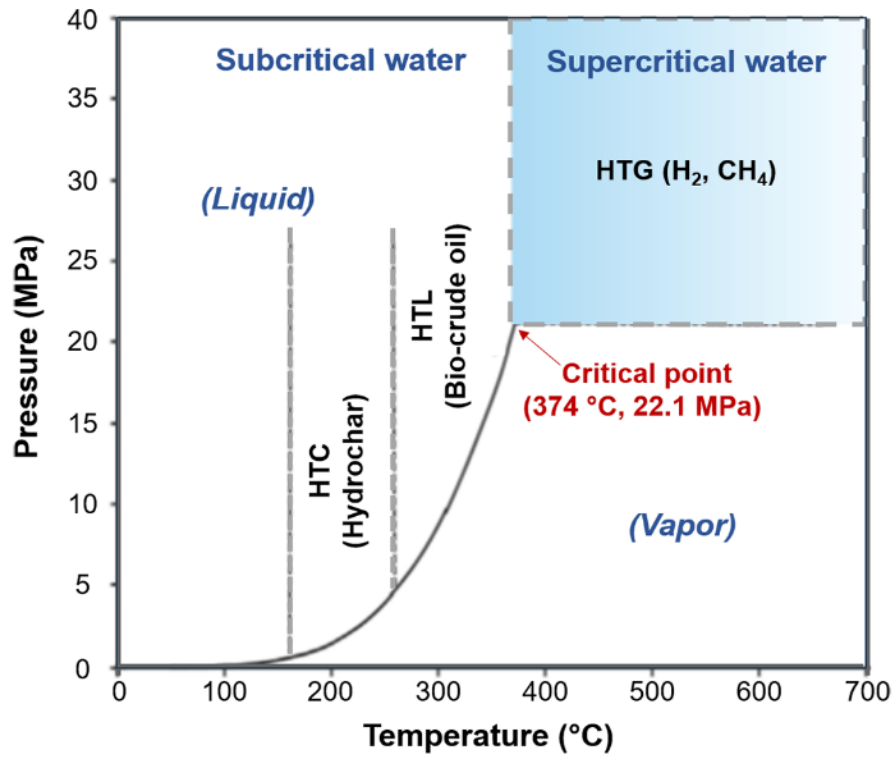

**Fig. S1** Classification of hydrothermal regions and their resulting principles products with reference to the pressure-temperature phase diagram of water. Adapted from ref.<sup>51-54</sup>

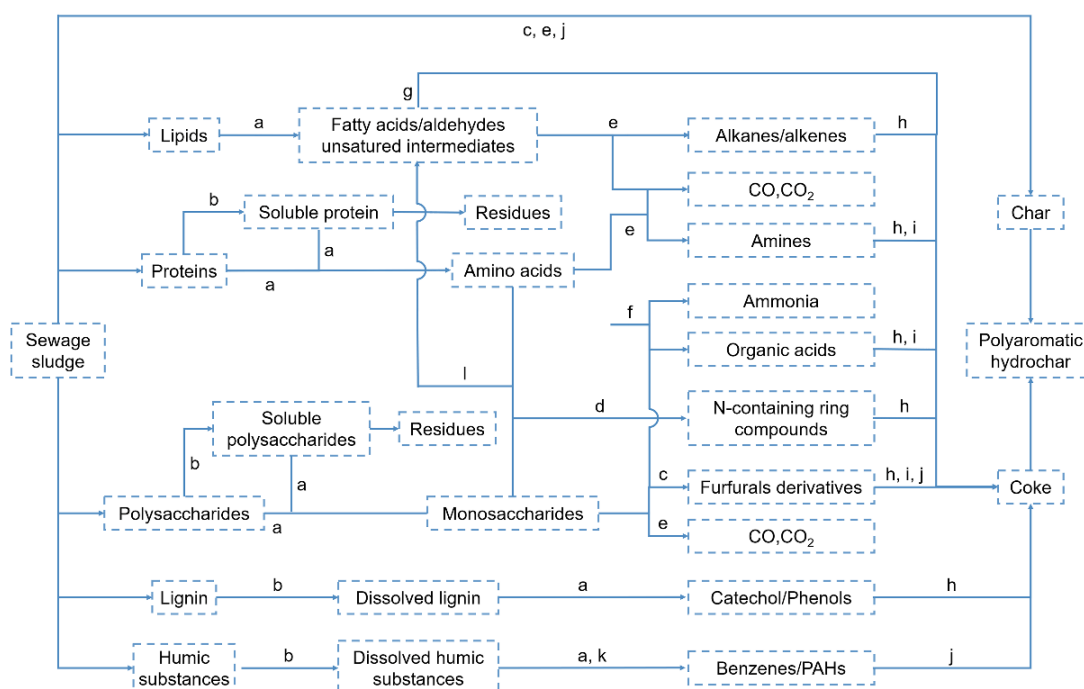

**Fig. S2** Schematic reaction pathways of sewage sludge to hydrochar: (a) hydrolysis, (b) solubilization, (c) dehydration, (d) Maillard reaction, (e) decarboxylation, (f) deamination, (g) aggregation, (h) polymerization, (i) aromatization, (j) condensation, (k) decomposition, (l) C-C cleavage, and PAHs=polycyclic aromatic hydrocarbons. Adapted from ref.<sup>55</sup>

## References

1. W. Yan, S. K. Hoekman, A. Broch and C. J. Coronella, *Environmental Progress & Sustainable Energy*, 2014, **33**, 676-680.
2. C. Peng, Y. Zhai, Y. Zhu, B. Xu, T. Wang, C. Li and G. Zeng, *Fuel*, 2016, **176**, 110-118.
3. S. Paiboonudomkarn, K. Wantala, Y. Lubphoo and R. Khunphonoi, *Materials Today: Proceedings*, 2023, **75**, 85-90.
4. X. Yang, B. Wang, Y. Guo, F. Yang and F. Cheng, *Journal of Analytical and Applied Pyrolysis*, 2023, **169**.
5. C. Wang, W. Zhu and X. Fan, *Waste Manag*, 2021, **123**, 88-96.
6. M. Wilk, M. Śliz and M. Gajek, *Renewable Energy*, 2021, **177**, 216-228.
7. R. Ji, Y. Zhou, J. Cai, K. Chu, Y. Zeng and H. Cheng, *Chemosphere*, 2023, **321**, 138138.
8. Z. Cao, B. Hulsemann, D. Wust, H. Oechsner, A. Lautenbach and A. Kruse, *Bioresour Technol*, 2021, **333**, 125110.
9. C. Cheng, Q. He, T. M. Ismail, A. Mosqueda, L. Ding, J. Yu and G. Yu, *Chemosphere*, 2022, **291**.
10. D. Kim, K. Yoshikawa and K. Park, *Energies*, 2015, **8**, 14040-14048.
11. F. Liu, R. Yu, X. Ji and M. Guo, *Bioresource technology*, 2018, **263**, 508-516.
12. U. Choe, A. M. Mustafa, H. Lin, J. Xu and K. Sheng, *Bioresource technology*, 2019, **283**, 340-349.
13. E. Sabio, A. Álvarez-Murillo, S. Román and B. Ledesma, *Waste management*, 2016, **47**, 122-132.
14. J. Minaret and A. Dutta, *Bioresource technology*, 2016, **200**, 804-811.
15. T. Zhang, X. Wu, X. Fan, D. C. W. Tsang, G. Li and Y. Shen, *J Environ Manage*, 2019, **236**, 108-117.
16. M. T. Reza, E. Rottler, L. Herklotz and B. Wirth, *Bioresource technology*, 2015, **182**, 336-344.
17. M. Pala, I. C. Kantarli, H. B. Buyukisik and J. Yanik, *Bioresource technology*, 2014, **161**, 255-262.
18. M. Wilk and A. Magdziarz, *Energy*, 2017, **140**, 1292-1304.
19. G. Zhu, L. Yang, Y. Gao, J. Xu, H. Chen, Y. Zhu, Y. Wang, C. Liao, C. Lu and C. Zhu, *Fuel*, 2019, **244**, 479-491.
20. R. K. Garlapalli, B. Wirth and M. T. Reza, *Bioresource technology*, 2016, **220**, 168-174.
21. J. Lee, K. Lee, D. Sohn, Y. M. Kim and K. Y. Park, *Energy*, 2018, **153**, 913-920.
22. J. Ma, M. Chen, T. Yang, Z. Liu, W. Jiao, D. Li and C. Gai, *Energy*, 2019, **173**, 732-739.
23. C. Gai, M. Chen, T. Liu, N. Peng and Z. Liu, *Energy*, 2016, **113**, 957-965.
24. Q. Lang, H. Luo, Y. Li, D. Li, Z. Liu and T. Yang, *Sustainable Energy & Fuels*, 2019, **3**, 2329-2336.
25. Q. Liu, G. Zhang, G. Kong, M. Liu, T. Cao, Z. Guo, X. Zhang and L. Han, *Renewable Energy*, 2023, **216**.

26. Q. Lang, B. Zhang, Z. Liu, W. Jiao, Y. Xia, Z. Chen, D. Li, J. Ma and C. Gai, *Journal of environmental management*, 2019, **233**, 440-446.
27. K. Kang, S. Nanda, G. Sun, L. Qiu, Y. Gu, T. Zhang, M. Zhu and R. Sun, *Energy*, 2019, **186**, 115795.
28. L. Cao, I. K. M. Yu, D. W. Cho, D. Wang, D. C. W. Tsang, S. Zhang, S. Ding, L. Wang and Y. S. Ok, *Bioresource technology*, 2019, **273**, 251-258.
29. K. Sheng, S. Zhang, J. Liu, E. Shuang, C. Jin, Z. Xu and X. Zhang, *Journal of Cleaner Production*, 2019, **237**, 117831.
30. Z. Liu, A. Quek, S. K. Hoekman and R. Balasubramanian, *Fuel*, 2013, **103**, 943-949.
31. S. K. Hoekman, A. Broch, C. Robbins, B. Zielinska and L. Felix, *Biomass Conversion and Biorefinery*, 2013, **3**, 113-126.
32. S. K. Hoekman, A. Broch and C. Robbins, *Energy & Fuels*, 2011, **25**, 1802-1810.
33. G. Zhang, K. Wang, Q. Liu, L. Han and X. Zhang, *Int J Environ Res Public Health*, 2022, **19**.
34. Q. Liu, R. Xu, C. Yan, L. Han, H. Lei, R. Ruan and X. Zhang, *Bioresour Technol*, 2021, **340**, 125630.
35. Q. Liu, G. Zhang, M. Liu, G. Kong, R. Xu, L. Han and X. Zhang, *Renewable Energy*, 2022, **198**, 521-533.
36. Y. Liu, S. Yao, Y. Wang, H. Lu, S. K. Brar and S. Yang, *Bioresource technology*, 2017, **235**, 332-337.
37. J. Fang, B. Gao, J. Chen and A. R. Zimmerman, *Chemical Engineering Journal*, 2015, **267**, 253-259.
38. P. Gao, Y. Zhou, F. Meng, Y. Zhang, Z. Liu, W. Zhang and G. Xue, *Energy*, 2016, **97**, 238-245.
39. X. Zhu, F. Qian, Y. Liu, S. Zhang and J. Chen, *RSC Advances*, 2015, **5**, 60713-60722.
40. X. Zhu, Y. Liu, C. Zhou, G. Luo, S. Zhang and J. Chen, *Carbon*, 2014, **77**, 627-636.
41. X. Zhu, Y. Liu, G. Luo, F. Qian, S. Zhang and J. Chen, *Environmental science & technology*, 2014, **48**, 5840-5848.
42. X. Zhu, Y. Liu, F. Qian, C. Zhou, S. Zhang and J. Chen, *ACS Sustainable Chemistry & Engineering*, 2015, **3**, 833-840.
43. S. S. Toor, H. Reddy, S. Deng, J. Hoffmann, D. Spangsmark, L. B. Madsen, J. B. Holm-Nielsen and L. A. Rosendahl, *Bioresource technology*, 2013, **131**, 413-419.
44. F. Safari, N. Javani and Z. Yumurtaci, *International Journal of Hydrogen Energy*, 2018, **43**, 1071-1080.
45. C. Gai, Y. Guo, T. Liu, N. Peng and Z. Liu, *International Journal of Hydrogen Energy*, 2016, **41**, 3363-3372.
46. S. Ahmad, X. Zhu, J. Luo, M. Shen, S. Zhou and S. Zhang, *Science of The Total Environment*, 2019, **687**, 1381-1388.
47. X. Zhuang, Y. Song, H. Zhan, X. Yin and C. Wu, *Fuel Processing Technology*, 2020, **199**, 106304.
48. K. P. R. Dandamudi, T. Murdock, P. J. Lammers, S. Deng and E. H. Fini, *Resources, Conservation and Recycling*, 2021, **170**.
49. X. Zhu, Y. Liu, F. Qian, S. Zhang and J. Chen, *Energy & Fuels*, 2015, **29**, 5222-5230.

50. A. Tavasoli, M. Aslan, M. Salimi, S. Balou, S. M. Pirbazari, H. Hashemi and K. Kohansal, *Energy Conversion and Management*, 2018, **173**, 15-28.
51. A. A. Peterson, F. Vogel, R. P. Lachance, M. Fröling, M. J. Antal Jr and J. W. Tester, *Energy & Environmental Science*, 2008, **1**, 32-65.
52. T. Wang, Y. Zhai, Y. Zhu, C. Li and G. Zeng, *Renewable and Sustainable Energy Reviews*, 2018, **90**, 223-247.
53. H. S. Kambo and A. Dutta, *Renewable and Sustainable Energy Reviews*, 2015, **45**, 359-378.
54. M. Kumar, A. O. Oyedun and A. Kumar, *Renewable and Sustainable Energy Reviews*, 2018, **81**, 1742-1770.
55. Y. Zhi, D. Xu, G. Jiang, W. Yang, Z. Chen, P. Duan and J. Zhang, *Fuel Processing Technology*, 2024, **254**.
